# Supplementary material
Source: HighWire-hosted journal article supplement (https://jcp.bmj.com/content/76/5/333)
Supplement: inline-supplementary-material-2 [file inline-supplementary-material-2.pdf]

**Supplementary Figure 1**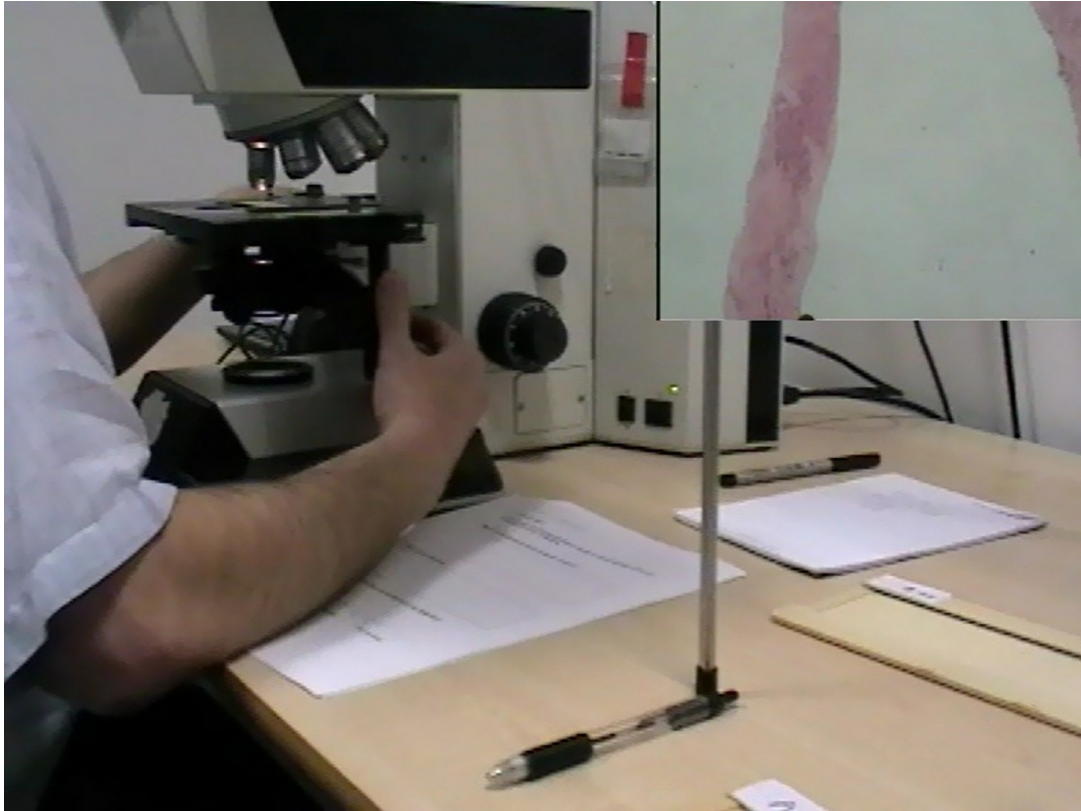

**Supplementary Figure 1** – Participant video recording with synchronised view down the microscope. Here a participant can be seen operating the light microscope with the answer sheet to their right. The view inset (top right) shows the view down the microscope as it was being recorded. Permission has been sought from the participant in the image.
